# Supplementary material for: Polarity of tetraalkylammonium-based ionic liquids and related low temperature molten salts
Source: Royal Society of Chemistry journal article supplement (doi:10.1039/c7nj00443e), 2017-01-01
Supplement: c7nj00443e1.pdf [file c7nj00443e1.pdf]

S1

## Supporting Information for

### Polarity of Tetraalkylammonium-based ionic liquids and related low temperature molten salts

*Gabi Thielemann<sup>a</sup> and Stefan Spange<sup>a\*</sup>*

<sup>a</sup> Department of Polymer Chemistry, Institute of Chemistry, Technische  
Universität Chemnitz, Germany

[stefan.spange@chemie.tu-chemnitz.de](mailto:stefan.spange@chemie.tu-chemnitz.de); Fax: +49 371 531 21239; Tel: + 49 371  
531 21230

#### **Content.**

Information to UV/Vis Measurements

Catalán parameter set

Kamlet-Taft parameter set

<sup>1</sup>H NMR spectroscopic studies

## Information to UV/Vis Measurements

The solvent parameters SA, SB, SP and SdP were determined by the solvatochromic method using special solvatochromic dyes (Figure S1).

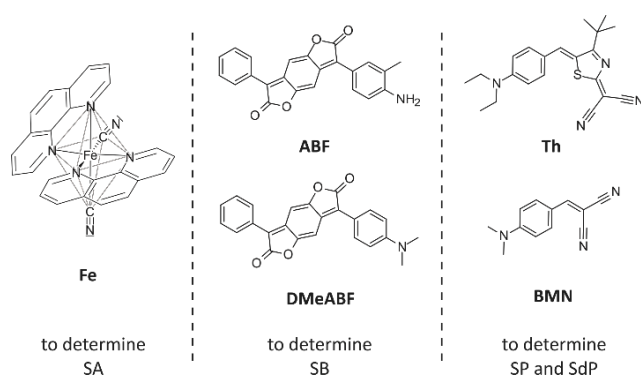

**Figure S1.** Pairs of solvatochromic dyes, to determine the Catalán parameter SA, SB, SP and SdP of ILs and LTMS. [ $\text{Fe}^{\text{II}}(1,10\text{-phenanthroline})_2(\text{CN})_2$ ] (**Fe**), 3-(4-amino-3-methylphenyl)-7-phenylbenzol[1,2-*b*:4,5-*b'*]difuran-2,6-dione (**ABF**), 3-(4-*N,N*-dimethylaminophenyl)-7-phenylbenzol[1,2-*b*:4,5-*b'*]difuran-2,6-dione (**DMe-ABF**), 4-*tert*-butyl-2-(dicyanomethylene)-5-[4-(dimethylamino)benzylidene]- $\Delta^3$ -thiazoline (**Th**), 2-[4-(*N,N*-dimethylamino)benzylidene]malononitrile (**BMN**)<sup>[S1]</sup>

Due to the higher SA value of Dichloromethane (DCM) in comparison to [ $\text{N}_{4441}$ ]Cl, it is not possible to determine the SA-Value of the salt in solution, because DCM is the stronger acceptor.<sup>[S2]</sup> The SB parameter of DCM is smaller than the used salts. However, the SB value of the salts are significantly depending on the concentration (Figure S1). To preserve valid results UV/Vis measurements are performed in the pure salts.

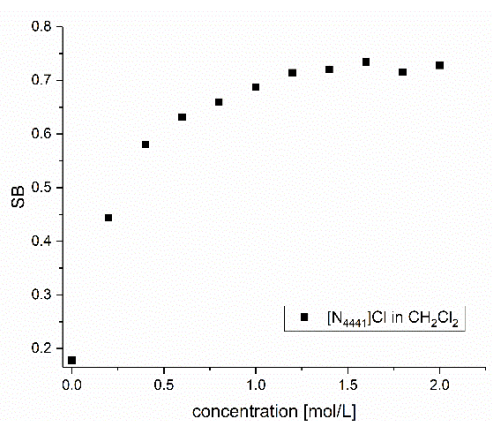

**Figure S2** SB parameter of [ $\text{N}_{4441}$ ]Cl as function of the concentration in DCM.

## Catalán parameter set [53,4]

**Table S1.** Overview of the obtained UV/Vis spectroscopic data of **Fe**, **ABF**, **DMeABF**, **Th** and **BMN**. a) Due to high temperature the Fe dye was destructed.

| substance                       |                                 | $\lambda_{\max,Fe}$ | $\tilde{\nu}_{\max,Fe}$               | $\lambda_{\max,ABF}$ | $\tilde{\nu}_{\max,ABF}$              | $\lambda_{\max,DMeABF}$ | $\tilde{\nu}_{\max,DMeABF}$           | $\lambda_{\max,Th}$ | $\tilde{\nu}_{\max,Th}$               | $\lambda_{\max,BMN}$ | $\tilde{\nu}_{\max,BMN}$              |
|---------------------------------|---------------------------------|---------------------|---------------------------------------|----------------------|---------------------------------------|-------------------------|---------------------------------------|---------------------|---------------------------------------|----------------------|---------------------------------------|
| cation                          | anion                           | [nm]                | [*10 <sup>-3</sup> cm <sup>-1</sup> ] | [nm]                 | [*10 <sup>-3</sup> cm <sup>-1</sup> ] | [nm]                    | [*10 <sup>-3</sup> cm <sup>-1</sup> ] | [nm]                | [*10 <sup>-3</sup> cm <sup>-1</sup> ] | [nm]                 | [*10 <sup>-3</sup> cm <sup>-1</sup> ] |
| [N <sub>4441</sub> ]            | Cl                              | 613                 | 16.313                                | 713                  | 14.025                                | 676                     | 14.792                                | 641                 | 15.601                                | 436                  | 22.936                                |
|                                 | CF <sub>3</sub> CO <sub>2</sub> | 598                 | 16.722                                | 676                  | 14.793                                | 665                     | 15.037                                | 632                 | 15.823                                | 436                  | 22.936                                |
|                                 | Br                              | a)                  | /                                     | 664                  | 15.060                                | 673                     | 14.858                                | 628                 | 15.923                                | 434                  | 23.041                                |
|                                 | NO <sub>3</sub>                 | a)                  | /                                     | 646                  | 15.480                                | 666                     | 15.015                                | 636                 | 15.723                                | 434                  | 23.041                                |
|                                 | N(CN) <sub>2</sub>              | 592                 | 16.892                                | 642                  | 15.576                                | 666                     | 15.015                                | 637                 | 15.696                                | 440                  | 22.727                                |
|                                 | CF <sub>3</sub> SO <sub>3</sub> | a)                  | /                                     | 611                  | 16.367                                | 654                     | 15.291                                | 629                 | 15.898                                | 438                  | 22.831                                |
|                                 | BF <sub>4</sub>                 | a)                  | /                                     | 596                  | 16.779                                | 653                     | 15.314                                | 627                 | 15.949                                | 432                  | 23.148                                |
|                                 | Ntf <sub>2</sub>                | 563                 | 17.762                                | 591                  | 16.920                                | 659                     | 15.175                                | 628                 | 15.924                                | 435                  | 22.989                                |
|                                 | PF <sub>6</sub>                 | a)                  | /                                     | 579                  | 17.271                                | 645                     | 15.504                                | 626                 | 15.974                                | 433                  | 23.095                                |
|                                 | [N <sub>8881</sub> ]            | Cl                  | 607                                   | 16.474               | 724                                   | 13.812                  | 674                                   | 14.837              | 630                                   | 15.873               | 432                                   |
| CF <sub>3</sub> CO <sub>2</sub> |                                 | 602                 | 16.611                                | 688                  | 14.534                                | 667                     | 14.992                                | 627                 | 15.949                                | 433                  | 23.095                                |
| Br                              |                                 | 608                 | 16.447                                | 691                  | 14.471                                | 671                     | 14.903                                | 631                 | 15.848                                | 433                  | 23.095                                |
| NO <sub>3</sub>                 |                                 | a)                  | /                                     | 668                  | 14.970                                | 673                     | 14.859                                | 630                 | 15.873                                | 432                  | 23.148                                |
| N(CN) <sub>2</sub>              |                                 | 590                 | 16.949                                | 655                  | 15.267                                | 673                     | 14.859                                | 633                 | 15.798                                | 437                  | 22.883                                |
| CF <sub>3</sub> SO <sub>3</sub> |                                 | a)                  | /                                     | 632                  | 15.823                                | 662                     | 15.106                                | 624                 | 16.026                                | 433                  | 23.095                                |
| BF <sub>4</sub>                 |                                 | a)                  | /                                     | 625                  | 16.000                                | 666                     | 15.015                                | 627                 | 15.949                                | 433                  | 23.095                                |
| Ntf <sub>2</sub>                |                                 | 587                 | 17.036                                | 608                  | 16.477                                | 664                     | 15.060                                | 626                 | 15.974                                | 436                  | 22.936                                |
| PF <sub>6</sub>                 |                                 | a)                  | /                                     | 604                  | 16.556                                | 662                     | 15.106                                | 626                 | 15.974                                | 433                  | 23.095                                |

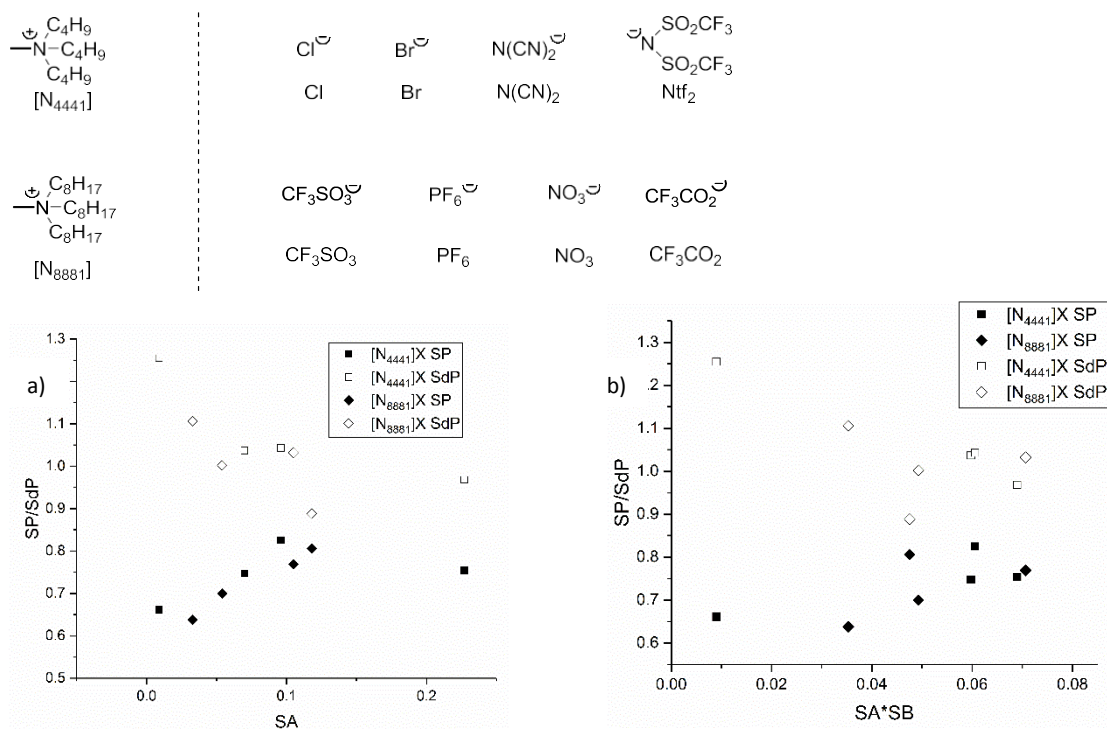

**Figure S3** Comparison of SP (filled symbols) and SdP (empty symbols) as function of SA [a]) and SA\*SB [b]), respectively, of tri-*n*-alkylmethylammonium cations with various anions.

## Kamlet-Taft parameter set

The Kamlet-Taft parameter of IL and LTMS could be calculated with the following equations:<sup>[55,6]</sup>

$$\alpha = -7.26 + 0.45\nu_{\max,Fe} [10^3\text{cm}^{-1}]$$

$$\beta = -3.84 + 0.20\nu_{\max,ABF} [10^3\text{cm}^{-1}]$$

$$\pi^* = 9.47 - 0.54\nu_{\max,Th} [10^3\text{cm}^{-1}]$$

**Table S2.** UV/Vis absorption maxima of the solvatochromic dyes Fe, ABF and Th measured tri-n-alkylmethylammonium salt (according to Scheme 2) and the calculated Kamlet-Taft solvent parameters  $\alpha$ ,  $\beta$ ,  $\pi^*$ .

| substance            |                                 | $\lambda_{\text{Fe}}$<br>[nm] | $\lambda_{\text{ABF}}$<br>[nm] | $\lambda_{\text{max,Th}}$<br>[nm] | $\alpha$ | $\beta$ | $\pi^*$ |
|----------------------|---------------------------------|-------------------------------|--------------------------------|-----------------------------------|----------|---------|---------|
| cation               | anion                           |                               |                                |                                   |          |         |         |
| [N <sub>4441</sub> ] | Cl                              | 613                           | 713                            | 641                               | 0.081    | 1.035   | 1.046   |
|                      | CF <sub>3</sub> CO <sub>2</sub> | 598                           | 676                            | 632                               | 0.265    | 0.881   | 0.926   |
|                      | Br                              | /                             | /                              | /                                 | /        | /       | /       |
|                      | NO <sub>3</sub>                 | /                             | 646                            | 636                               | /        | 0.744   | 0.979   |
|                      | N(CN) <sub>2</sub>              | 592                           | 642                            | 637                               | 0.341    | 0.725   | 0.993   |
|                      | CF <sub>3</sub> SO <sub>3</sub> | /                             | 611                            | 629                               | /        | 0.567   | 0.885   |
|                      | BF <sub>4</sub>                 | /                             | 596                            | 627                               | /        | 0.484   | 0.858   |
|                      | Ntf <sub>2</sub>                | 563                           | 591                            | 628                               | 0.733    | 0.456   | 0.871   |
|                      | PF <sub>6</sub>                 | /                             | 579                            | 626                               | /        | 0.386   | 0.844   |
| [N <sub>8881</sub> ] | Cl                              | 607                           | 724                            | 630                               | 0.154    | 1.078   | 0.899   |
|                      | CF <sub>3</sub> CO <sub>2</sub> | 602                           | 688                            | 627                               | 0.215    | 0.933   | 0.858   |
|                      | Br                              | /                             | /                              | /                                 | /        | /       | /       |
|                      | NO <sub>3</sub>                 | /                             | 668                            | 630                               | /        | 0.846   | 0.899   |
|                      | N(CN) <sub>2</sub>              | 590                           | 655                            | 633                               | 0.367    | 0.787   | 0.939   |
|                      | CF <sub>3</sub> SO <sub>3</sub> | /                             | 632                            | 624                               | /        | 0.675   | 0.816   |
|                      | BF <sub>4</sub>                 | 604                           | 625                            | 627                               | /        | 0.640   | 0.858   |
|                      | Ntf <sub>2</sub>                | 587                           | 608                            | 626                               | 0.406    | 0.551   | 0.844   |
|                      | PF <sub>6</sub>                 | /                             | 604                            | 626                               | /        | 0.529   | 0.844   |

## $^1\text{H}$ NMR spectroscopic studies

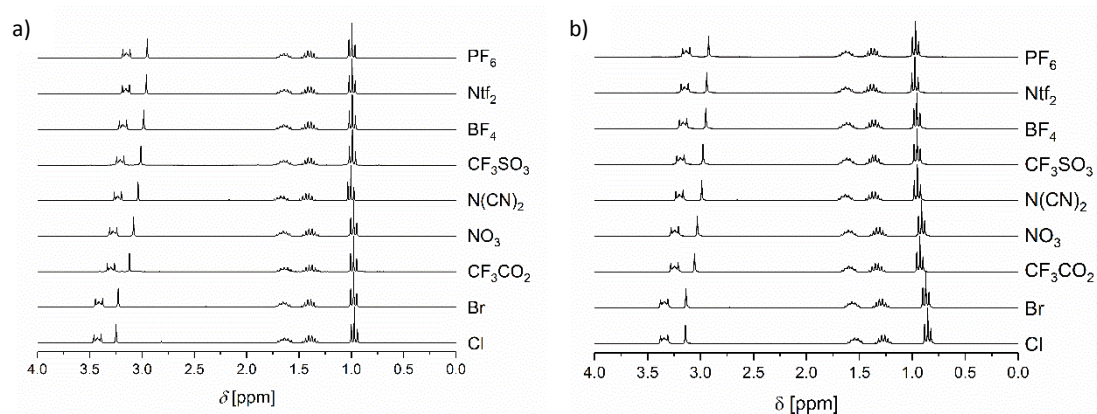

**Figure S4**  $^1\text{H}$  NMR spectra of  $[\text{N}_{4441}]\text{X}$  with various anions in  $\text{CD}_2\text{Cl}_2$  at the concentration of 0.2 M [a)] and 1.0 M [b)].

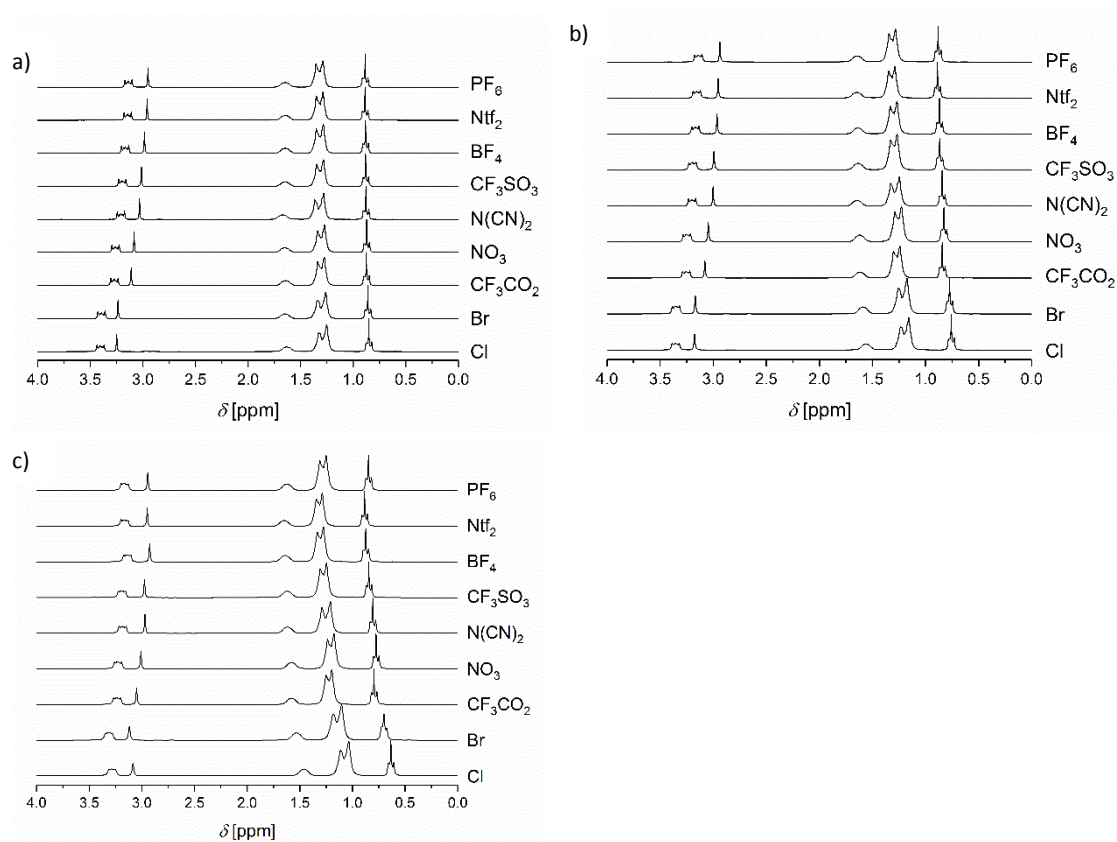

**Figure S5**  $^1\text{H}$  NMR spectra of  $[\text{N}_{8881}]\text{X}$  with various anions in  $\text{CD}_2\text{Cl}_2$  at the concentration of 0.2 M [a)], 1.0 M [b)] and 1.8 M [c)].

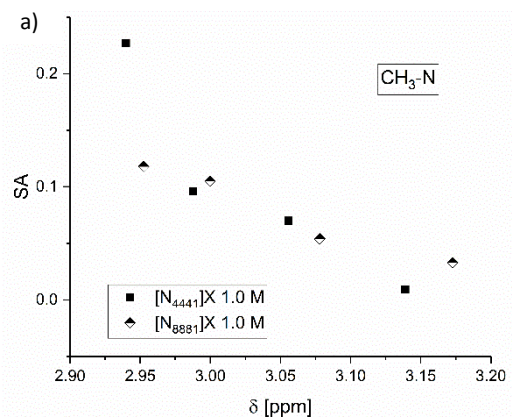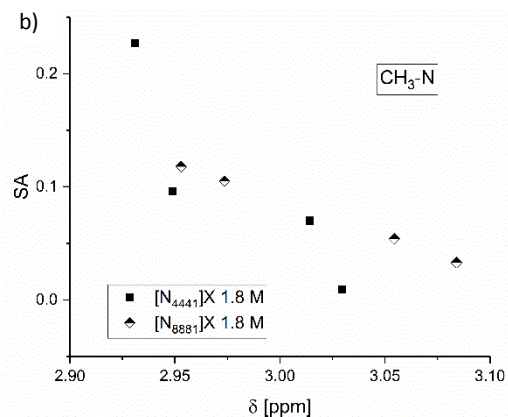

**Figure S6** SA as a function of the chemical shift of the hydrogen atoms ( $\text{CH}_3\text{-N}$ ) measured in  $\text{CD}_2\text{Cl}_2$  at the concentration of 1.0 M [a)], 1.8 M [b)].

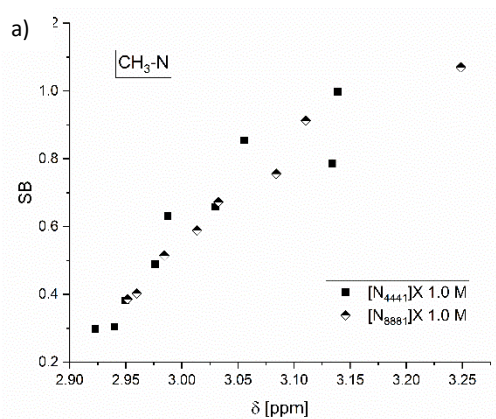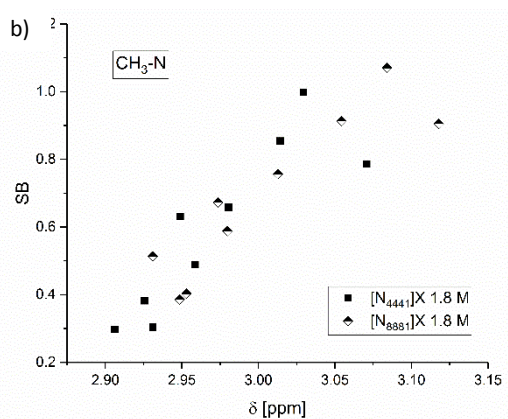

**Figure S7** SB as a function of the chemical shift of the hydrogen atoms ( $\text{CH}_3\text{-N}$ ) measured in  $\text{CD}_2\text{Cl}_2$  at the concentration of 1.0 M [a)], 1.8 M [b)].

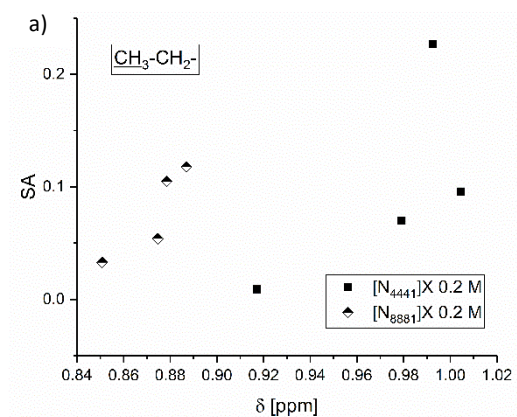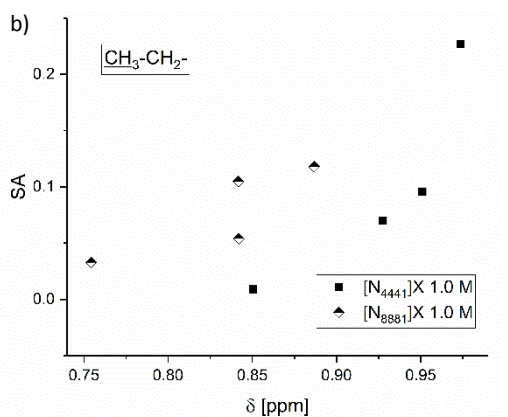

**Figure S8** SA as a function of the chemical shift of the hydrogen atoms ( $\text{CH}_3\text{-CH}_2\text{-}$ ) measured in  $\text{CD}_2\text{Cl}_2$  at the concentration of 0.2 M [a)], 1.0 M [b)].

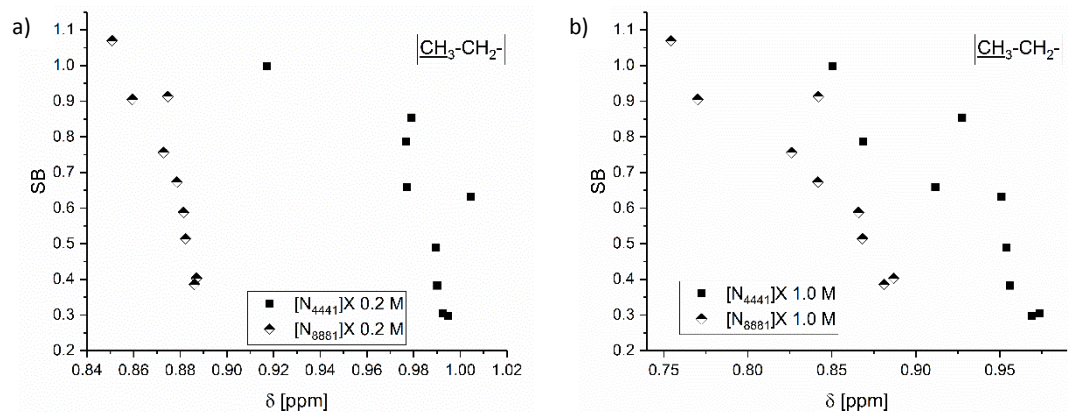

**Figure S9** SB as a function of the chemical shift of the hydrogen atoms ( $\text{CH}_3\text{-CH}_2$ ) measured in  $\text{CD}_2\text{Cl}_2$  at the concentration of 0.2 M [a)], 1.0 M [b)].

[S1] A. Schade, N. Behme and S. Spange, *Chem. – Eur. J.*, 2014, **20**, 2232–2243.

[S2] J. Catalán, *J. Phys. Chem B*, 2009, **113**, 5951–5960.

[S3] J. Catalán, J. Palomar, C. Díaz and J. L. G. de Paz, *J. Phys. Chem. A*, 1997, **101**, 5183–5189.

[S4] J. Catalán, C. Díaz, V. López, P. Pérez, J.-L. G. De Paz and J. G. Rodríguez, *Liebigs Ann.*, 1996, **11**, 1785–1794.

[S5] S. Spange, R. Lungwitz and A. Schade, *J. Mol. Liq.*, 2014, **192**, 137–143.

[S6] M. J. Kamlet, J.-L. M. Abboud, M. H. Abraham, R. W. Taft, *J. Org. Chem.*, 1983, **48**, 2877–2887.
